# Supplementary material for: 14-3-3ε Mediates the Cell Fate Decision-Making Pathways in Response of Hepatocellular Carcinoma to Bleomycin-Induced DNA Damage
Source: PubMed Central journal article supplement (PMC3589417; doi:10.1371/journal.pone.0055268), 2013-03-05
Supplement: pone.0055268.s002.pdf [file pone.0055268.s002.pdf]

**Figure S2**

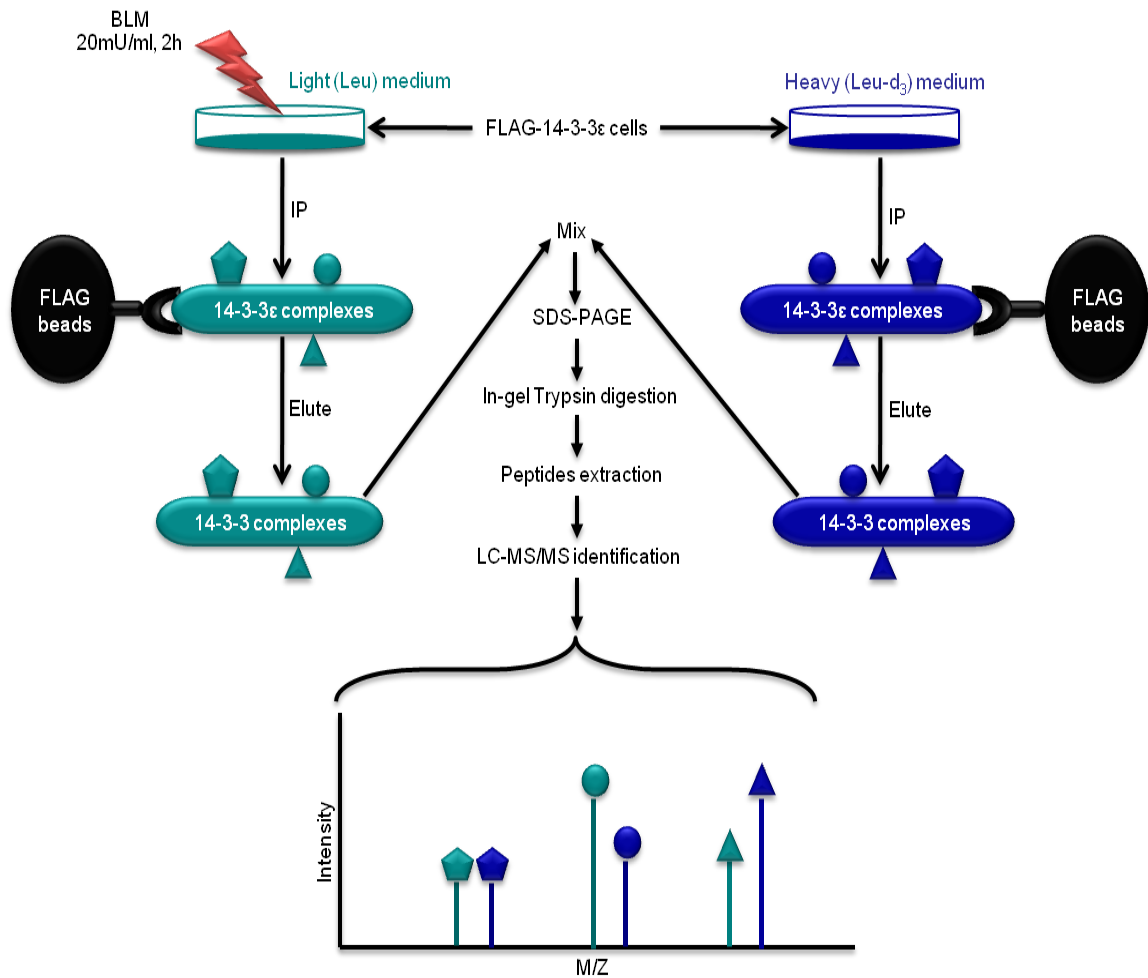

**Figure S2. Schematic design of dual-tagging quantitative proteomic approach.** HCC cells stably expressing FLAG-14-3-3 $\epsilon$  maintained in “light” medium (Leu) were treated with 20mU/ml BLM for 2h. In parallel, cells maintained in “heavy” medium (Leu-d<sub>3</sub>) were left untreated. The FLAG-14-3-3 $\epsilon$  complex were immunoprecipitated (IP) from the whole cell lysate derived from each cell pool using anti-FLAG beads and eluted by 1 $\times$ FLAG peptide, respectively. IP products were then mixed at 1:1 based on the total protein mass followed by SDS-PAGE separation, in-gel trypsin digestion, and LC-MS/MS analysis.
