# Supplementary material for: 14-3-3ε Mediates the Cell Fate Decision-Making Pathways in Response of Hepatocellular Carcinoma to Bleomycin-Induced DNA Damage
Source: PubMed Central journal article supplement (PMC3589417; doi:10.1371/journal.pone.0055268), 2013-03-05
Supplement: pone.0055268.s003.pdf [file pone.0055268.s003.pdf]

**Figure S3**

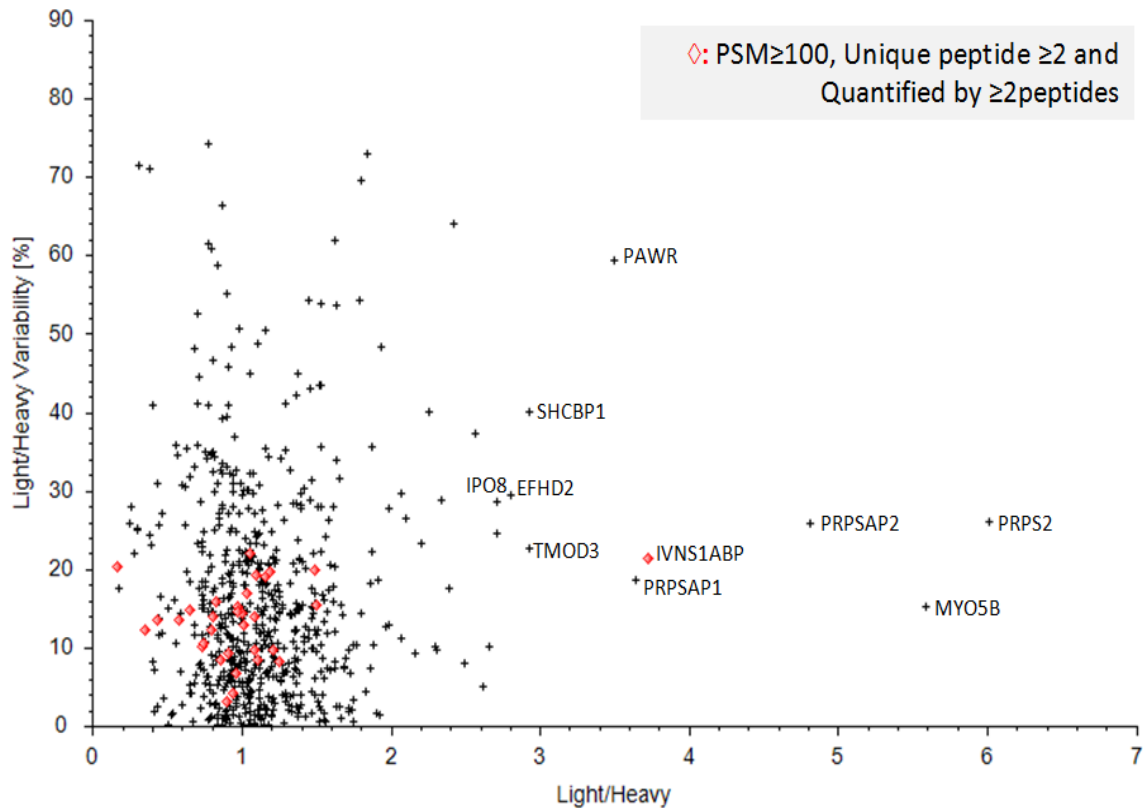

**Figure S3. The plot of AACT/SILAC ratio distribution of identified peptides/proteins and the ratio variability of all quantifiable proteins.** All the raw data generated by LTQ-Orbitrap (Thermo Scientific) was re-processed on Proteome Discoverer platform (v1.3, Thermo Scientific) and searched against the UniProt protein database (Released in 2010\_9, 20286 human sequences). The top 32 most abundant proteins (PSM $\geq$ 100 and unique peptide $\geq$ 2) were highlighted by red diamonds. Those proteins with significant changes identified by both platforms (Bioworks v3.3.1SP1 and Proteome Discoverer v1.3) were indicated. As a result, over 94% of overall quantifiable proteins are showing less than 40% ratio variability, and more than 70% have variabilities less than 20%. Also the most abundant proteins in the complex have ratio variabilities varying from 3.2% to 21.9%. The average is at 13.39 ( $\pm$ 4.88 SD). This variation is consistent with the Bioworks result and our manual inspection. Therefore, we chose the cutoff value at three times of the variability or 1.4.
