# Supplementary material for: 14-3-3ε Mediates the Cell Fate Decision-Making Pathways in Response of Hepatocellular Carcinoma to Bleomycin-Induced DNA Damage
Source: PubMed Central journal article supplement (PMC3589417; doi:10.1371/journal.pone.0055268), 2013-03-05
Supplement: pone.0055268.s004.pdf [file pone.0055268.s004.pdf]

Figure S4

A

IPI:IPI00000816.1 Gene Symbol=YWHAE, 14-3-3 protein epsilon

K.EALQDVEDENQ. Charge: 2+

BLM21 #1620-1742 RT: 27.15-27.97 AV: 20 NL: 1.16E5  
F: FTMS + p ESI Full ms [400.00-2000.00]

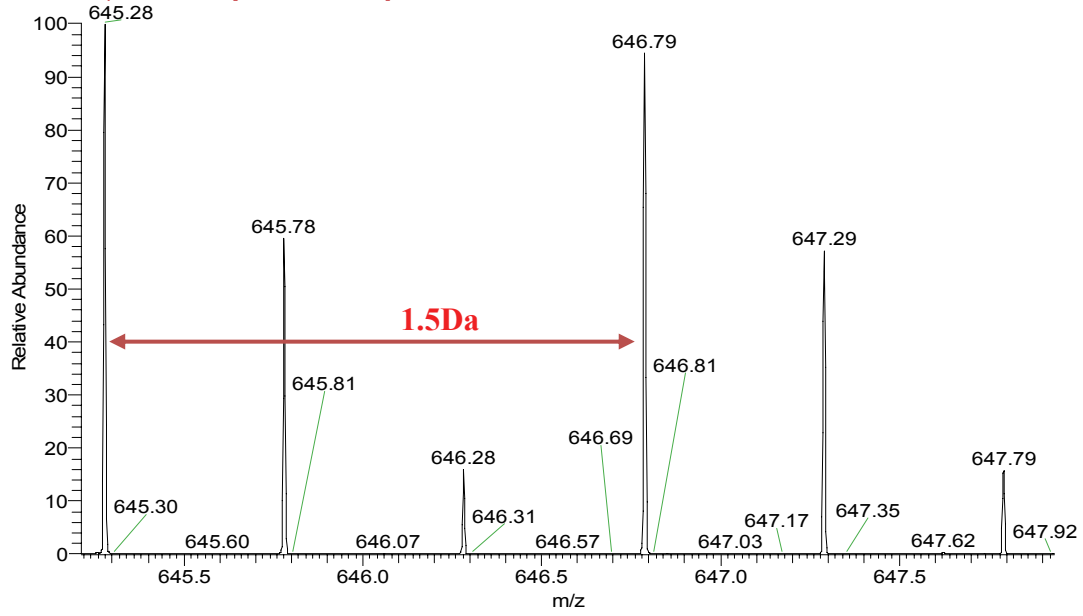

B

IPI:IPI00013774.1 Gene Symbol=HDAC1, Histone deacetylase 1

K.LHISPSNMNTNQNTNEYLEK.I Charge: 3+

BLM12 #3088-3102 RT: 42.59-42.65 AV: 2 NL: 1.53E4  
F: FTMS + p ESI Full ms [400.00-2000.00]

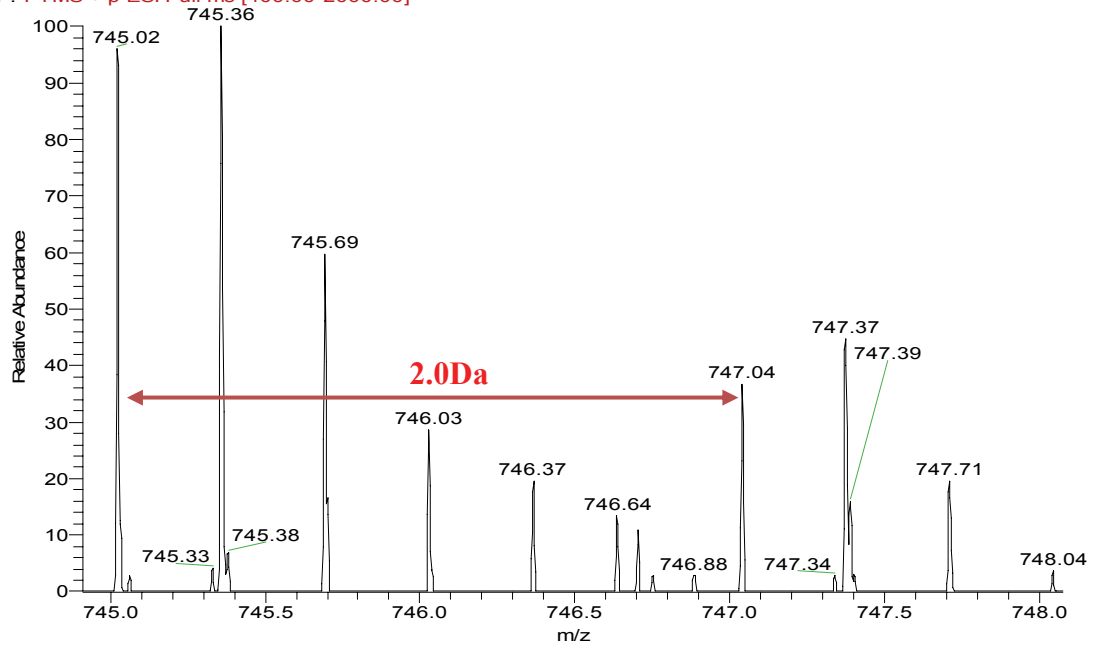

C

IPI:IPI00304596.3 Gene Symbol=NONO, Non-POU domain-containing octamer-binding protein

R.LFVGNLPPDITEEEMR.K Charge: 2+

BLM12 #5523-5664 RT: 58.53-59.44 AV: 19 NL: 8.56E4  
F: FTMS + p ESI Full ms [400.00-2000.00]

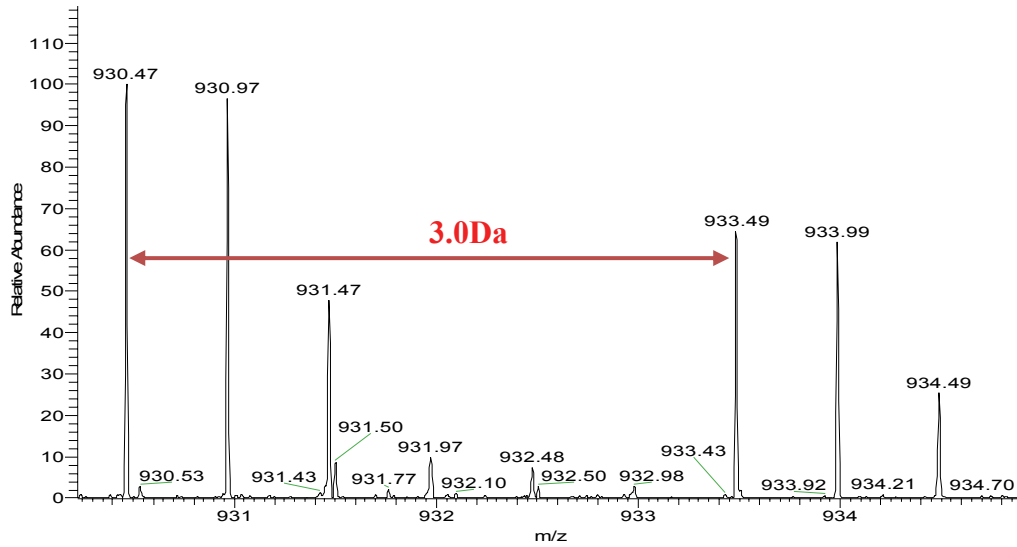

D

IPI:IPI00005711.2 Gene Symbol=HDAC6, Histone deacetylase 6

K.EQLIQEGLLDR.C Charge: 2+

BLM4 #4801-4898 RT: 50.40-50.99 AV: 12 NL: 6.14E4  
F: FTMS + p ESI Full ms [400.00-2000.00]

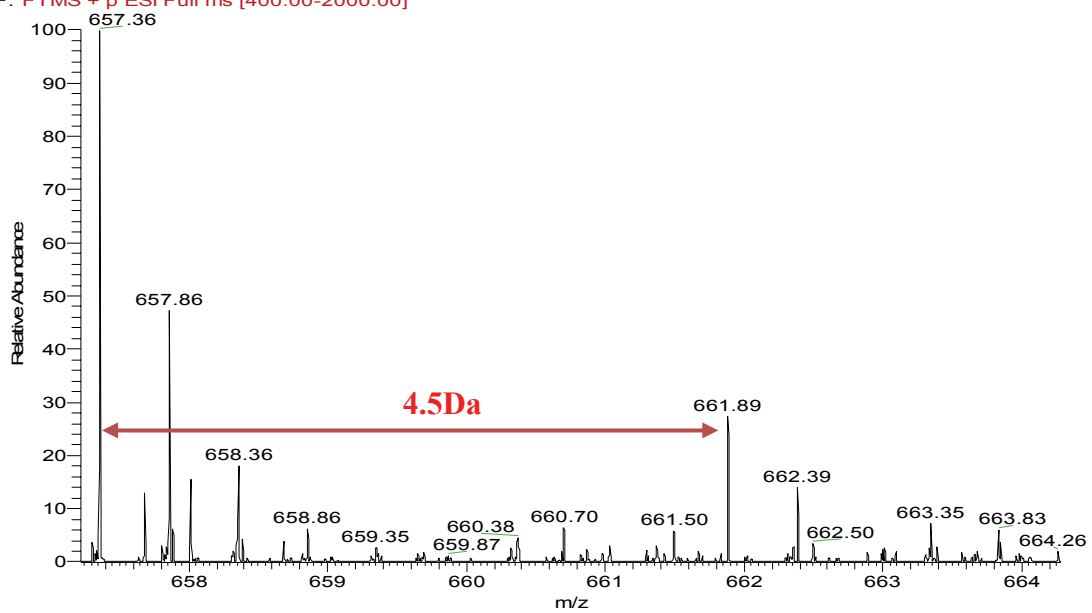

**E**

**IPI:IPI00293464.5 Gene Symbol=DDB1, DNA damage-binding protein 1**

**K.MQEVVANLQYDDGSGMK.R Charge: 2+**

BLM6 #3904-3967 RT: 45.68-46.01 AV: 8 NL: 1.43E4  
F: FTMS + p ESI Full ms [400.00-2000.00]

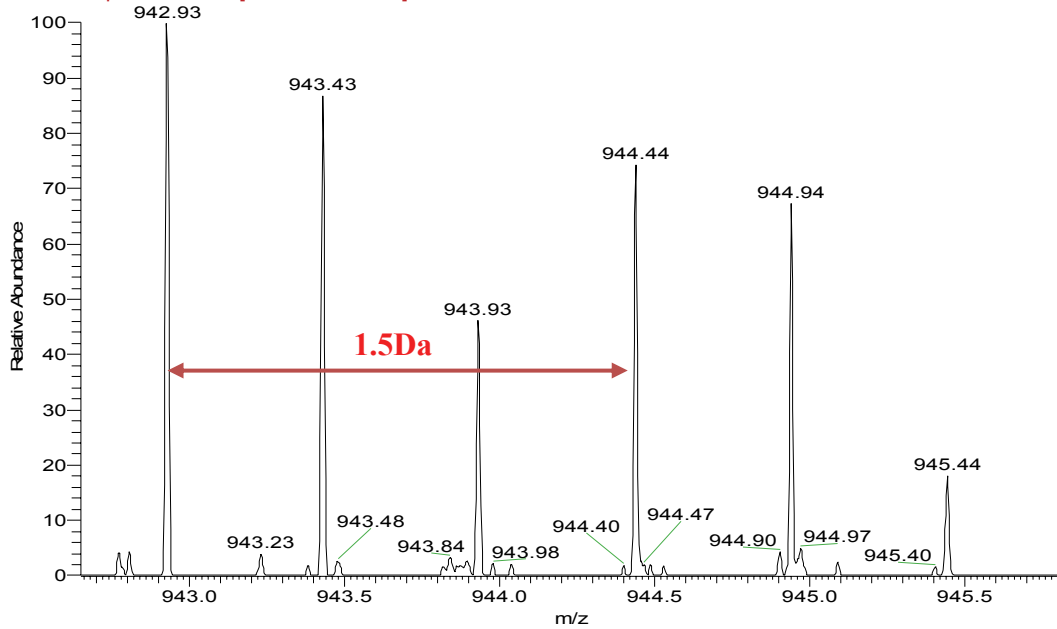

**F**

**IPI:IPI00218566.1 Gene Symbol=MAP3K7, Isoform 1A of Mitogen-activated protein kinase kinase kinase 7**

**R.SIQDLTVTGTEPGQVSSR.S Charge: 2+**

BLM10 #2819-2926 RT: 40.95-41.65 AV: 14 NL: 1.37E5  
F: FTMS + p ESI Full ms [400.00-2000.00]

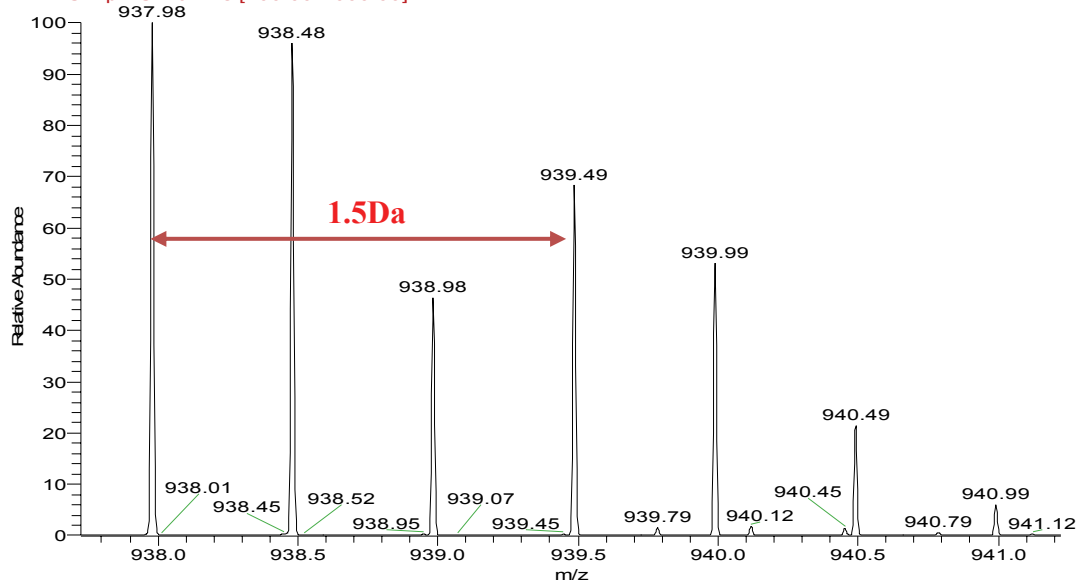

**G**

**IPI:IPI00019459.1 Gene Symbol=MAP3K7IP1, Mitogen-activated protein kinase kinase kinase 7-interacting protein 1**

**K.QTSLDAVAQAVVDR.V Charge: 2+**

BLM12 #5049-5203 RT: 55.42-56.36 AV: 20 NL: 8.13E5  
F: FTMS + p ESI Full ms [400.00-2000.00]

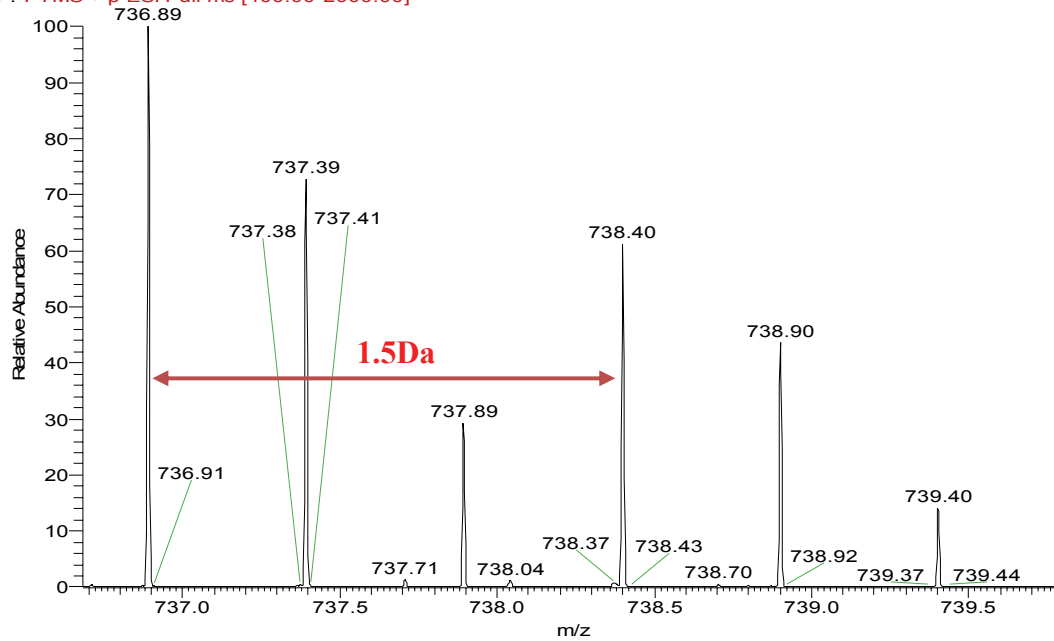

**Figure S4. Representative MS spectra of BLM-induced 14-3-3 $\epsilon$  interactors. A.** 14-3-3 $\epsilon$  (bait protein). **B.** HDAC1. **C.** NONO. **D.** HDAC6. **E.** DDB1. **F.** MAP3K7 (TAK1). **G.** MAP3K7IP1 (TAB1).
