# Supplementary material for: 14-3-3ε Mediates the Cell Fate Decision-Making Pathways in Response of Hepatocellular Carcinoma to Bleomycin-Induced DNA Damage
Source: PubMed Central journal article supplement (PMC3589417; doi:10.1371/journal.pone.0055268), 2013-03-05
Supplement: pone.0055268.s005.pdf [file pone.0055268.s005.pdf]

**Figure S5**

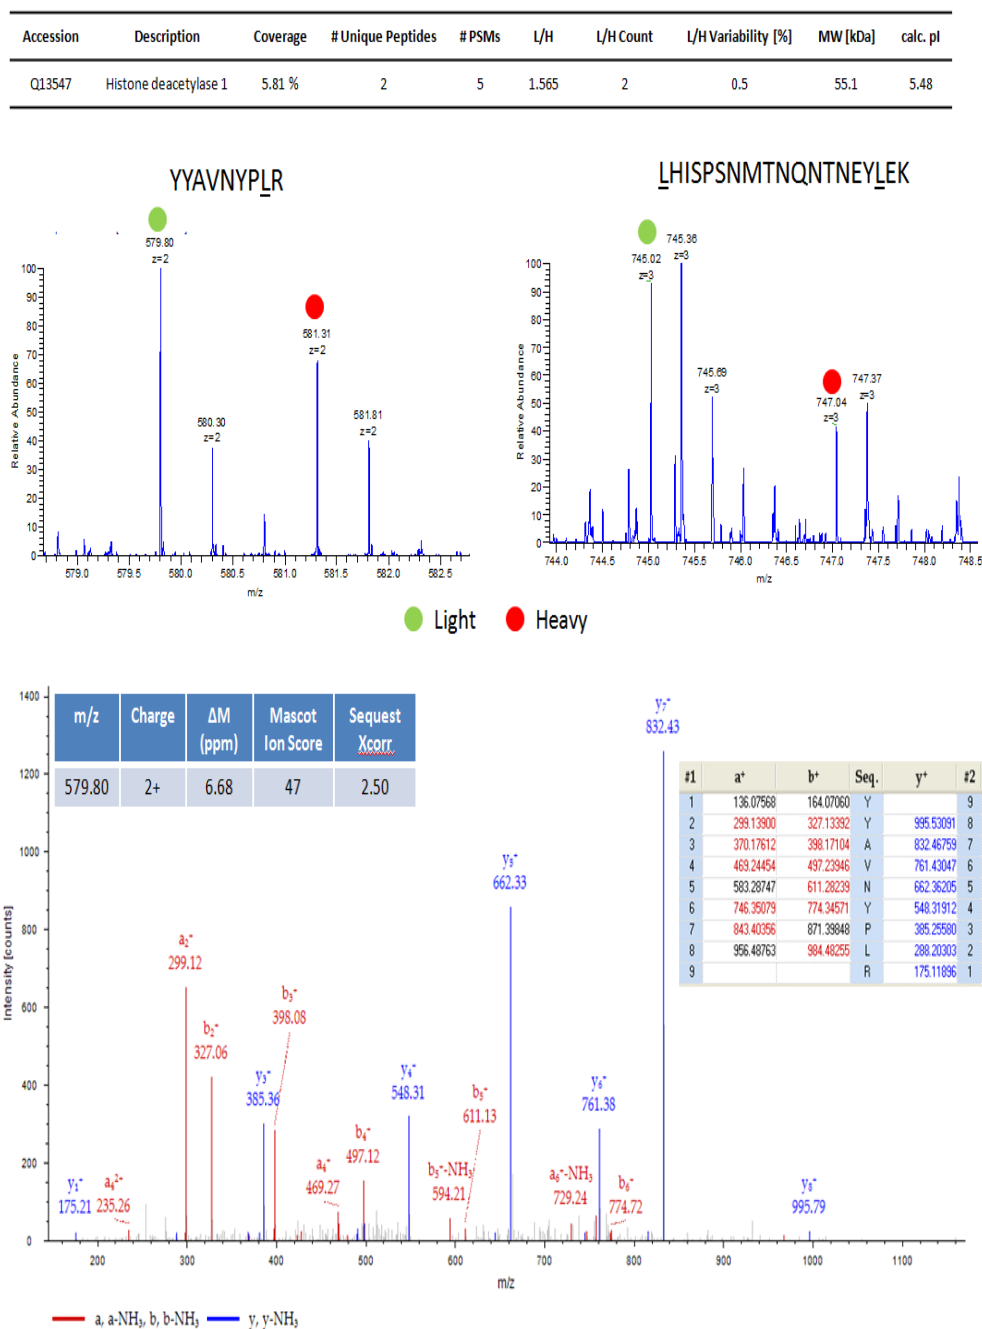

**Figure S5. MS and MS/MS spectra of the peptides matched to HDAC1.** All raw data generated on LTQ-Orbitrap (Thermo Scientific) were re-processed using Proteome Discoverer software (v1.3, Thermo Scientific), which resulted in one more unique peptide (YYAVNYPLR) of HDAC1 compared to the previous results from Bioworks (v3.3.1SP1) search (Figure S4B). The AACT/SILAC pairs of both peptides and a representative MS/MS are shown.
