# Supplementary material for: 14-3-3ε Mediates the Cell Fate Decision-Making Pathways in Response of Hepatocellular Carcinoma to Bleomycin-Induced DNA Damage
Source: PubMed Central journal article supplement (PMC3589417; doi:10.1371/journal.pone.0055268), 2013-03-05
Supplement: pone.0055268.s006.pdf [file pone.0055268.s006.pdf]

**Figure S6**

| #1 | b <sup>+</sup> | b <sup>2+</sup> | Seq. | y <sup>+</sup> | y <sup>2+</sup> | #2 |
|----|----------------|-----------------|------|----------------|-----------------|----|
| 1  | 88.03931       | 44.52329        | S    |                |                 | 18 |
| 2  | 201.12338      | 101.06533       | I    | 1787.91346     | 894.46037       | 17 |
| 3  | 329.18196      | 165.09462       | Q    | 1674.82939     | 837.91833       | 16 |
| 4  | 444.20891      | 222.60809       | D    | 1546.77081     | 773.88904       | 15 |
| 5  | 557.29298      | 279.15013       | L    | 1431.74386     | 716.37557       | 14 |
| 6  | 658.34066      | 329.67397       | T    | 1318.65979     | 659.83353       | 13 |
| 7  | 757.40908      | 379.20818       | V    | 1217.61211     | 609.30969       | 12 |
| 8  | 858.45676      | 429.73202       | T    | 1118.54369     | 559.77548       | 11 |
| 9  | 915.47823      | 458.24275       | G    | 1017.49601     | 509.25164       | 10 |
| 10 | 1016.52591     | 508.76659       | T    | 960.47454      | 480.74091       | 9  |
| 11 | 1145.56851     | 573.28789       | E    | 859.42686      | 430.21707       | 8  |
| 12 | 1242.62128     | 621.81428       | P    | 730.38426      | 365.69577       | 7  |
| 13 | 1299.64275     | 650.32501       | G    | 633.33149      | 317.16938       | 6  |
| 14 | 1427.70133     | 714.35430       | Q    | 576.31002      | 288.65865       | 5  |
| 15 | 1526.76975     | 763.88851       | V    | 448.25144      | 224.62936       | 4  |
| 16 | 1613.80178     | 807.40453       | S    | 349.18302      | 175.09515       | 3  |
| 17 | 1700.83381     | 850.92054       | S    | 262.15099      | 131.57913       | 2  |
| 18 |                |                 | R    | 175.11896      | 88.06312        | 1  |

**SIQDLTVTGTEPGQVSSR**  
 (unphosphorylated form)

| m/z    | Charge | $\Delta M$<br>(ppm) | Mascot<br>Ion Score | Sequest<br>Xcorr |
|--------|--------|---------------------|---------------------|------------------|
| 937.98 | 2+     | 5.40                | 62                  | 4.23             |

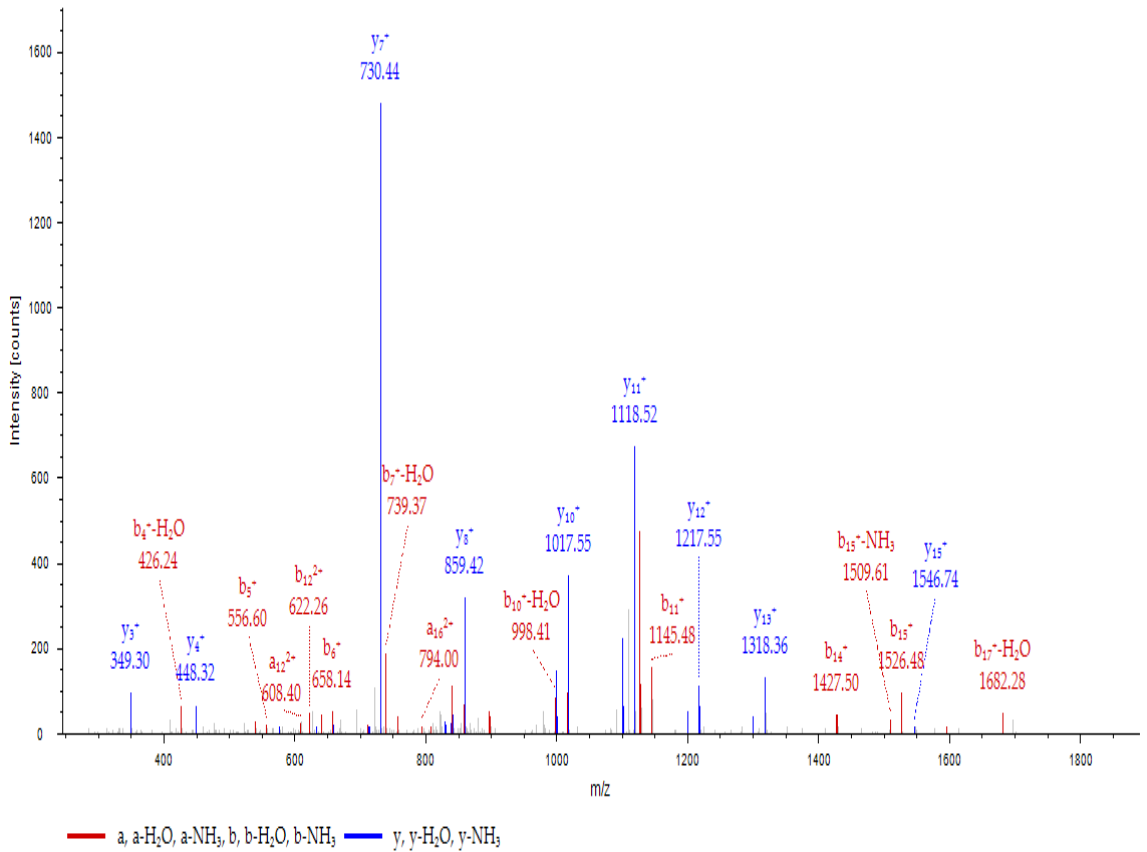

**S<sub>p</sub>IQDLTVTGTGTEPGQVSSR**  
(phosphorylated form)

| m/z    | Charge | ΔM (ppm) | Mascot Ion Score | Sequest Xcorr |
|--------|--------|----------|------------------|---------------|
| 977.96 | 2+     | 4.92     | 57               | 4.73          |

| #1 | b <sup>-</sup> | b <sup>2+</sup> | Seq.      | y <sup>+</sup> | y <sup>2+</sup> | #2 |
|----|----------------|-----------------|-----------|----------------|-----------------|----|
| 1  | 168.00564      | 84.50646        | S-Phospho |                |                 | 18 |
| 2  | 281.08971      | 141.04849       | I         | 1787.91346     | 894.46037       | 17 |
| 3  | 409.14829      | 205.07778       | Q         | 1674.82939     | 837.91833       | 16 |
| 4  | 524.17524      | 262.59126       | D         | 1546.77081     | 773.88904       | 15 |
| 5  | 637.25931      | 319.13329       | L         | 1431.74386     | 716.37557       | 14 |
| 6  | 738.30699      | 369.65713       | T         | 1318.65979     | 659.83353       | 13 |
| 7  | 837.37541      | 419.19134       | V         | 1217.61211     | 609.30969       | 12 |
| 8  | 938.42309      | 469.71518       | T         | 1118.54369     | 559.77548       | 11 |
| 9  | 995.44456      | 498.22592       | G         | 1017.49601     | 509.25164       | 10 |
| 10 | 1096.49224     | 548.74976       | T         | 960.47454      | 480.74091       | 9  |
| 11 | 1225.53484     | 613.27106       | E         | 859.42686      | 430.21707       | 8  |
| 12 | 1322.58761     | 661.79744       | P         | 730.38426      | 365.69577       | 7  |
| 13 | 1379.60908     | 690.30818       | G         | 633.33149      | 317.16938       | 6  |
| 14 | 1507.66766     | 754.33747       | Q         | 576.31002      | 288.65865       | 5  |
| 15 | 1606.73608     | 803.87168       | V         | 448.25144      | 224.62936       | 4  |
| 16 | 1693.76811     | 847.38769       | S         | 349.18302      | 175.09515       | 3  |
| 17 | 1780.80014     | 890.90371       | S         | 262.15099      | 131.57913       | 2  |
| 18 |                |                 | R         | 175.11896      | 88.06312        | 1  |

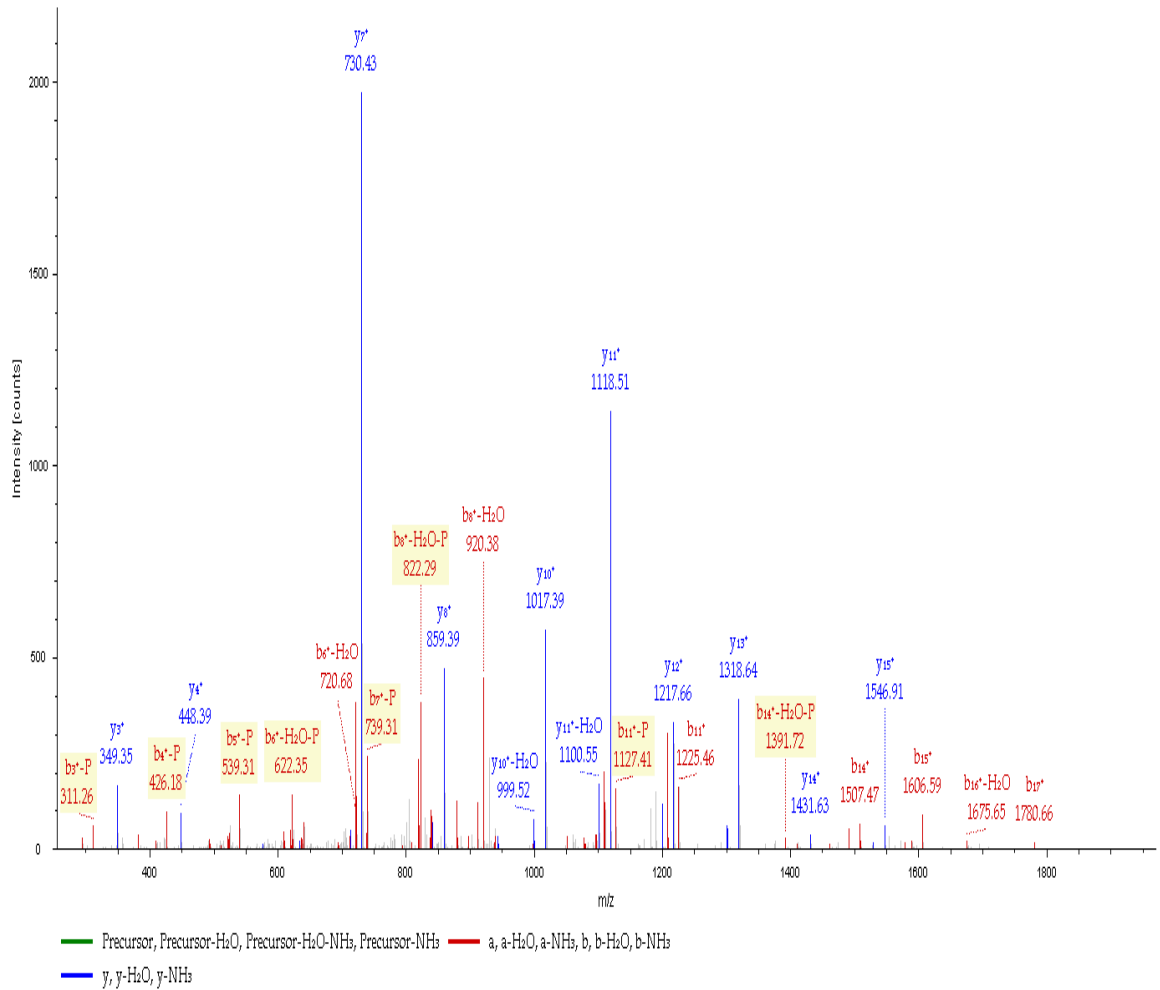

**Figure S6. Ser412 on TAK1 was identified as a BLM-induced phosphorylation site by MS/MS. The MS/MS spectra of both phosphorylated and unphosphorylated sequence (SIQDLTVTGTGTEPGQVSSR) were shown.**
