# Supplementary material for: 14-3-3ε Mediates the Cell Fate Decision-Making Pathways in Response of Hepatocellular Carcinoma to Bleomycin-Induced DNA Damage
Source: PubMed Central journal article supplement (PMC3589417; doi:10.1371/journal.pone.0055268), 2013-03-05
Supplement: pone.0055268.s009.pdf [file pone.0055268.s009.pdf]

**Table S3.** The identified BLM-induced 14-3-3 $\epsilon$  interactors and their associations with different biological processes or pathways

| <b>IPI No.</b>                         | <b>Gene Symbol</b> | <b>Protein Name</b>                                                                                        | <b>Pep. ID (Pep*)<sup>a</sup></b> | <b>Ratio (L/H)<sup>b</sup></b> | <b>SD<sup>c</sup></b> |
|----------------------------------------|--------------------|------------------------------------------------------------------------------------------------------------|-----------------------------------|--------------------------------|-----------------------|
| IPI00000816.1                          | YWHAE              | 14-3-3 epsilon (bait)                                                                                      | 10(5)                             | 1.00                           | 0.11                  |
| <b>Chromosome remodeling</b>           |                    |                                                                                                            |                                   |                                |                       |
| IPI00005711.2                          | HDAC6              | histone deacetylase 6                                                                                      | 2(2)                              | 2.77                           | 0.57                  |
| IPI00013774.1                          | HDAC1              | histone deacetylase 1                                                                                      | 1(1)                              | 1.97                           |                       |
| IPI00171798.1                          | MTA2               | metastasis associated 1 family, member 2                                                                   | 1(1)                              | 2.19                           |                       |
| IPI00299000.5                          | PA2G4              | proliferation-associated protein 2G4                                                                       | 3(2)                              | 1.41                           | 0.54                  |
| IPI00328319.8                          | RBBP4              | retinoblastoma binding protein 4                                                                           | 3(2)                              | 1.56                           | 0.05                  |
| IPI00413755.1                          | TAF4               | transcription initiation factor TFIID subunit 4                                                            | 5(3)                              | 2.19                           | 0.04                  |
| IPI00150057.6                          | SMARCC2            | isoform 2 of SWI/SNF-related matrix-associated actin-dependent regulator of chromatin subfamily C member 2 | 4(3)                              | 2.01                           | 0.11                  |
| IPI00221035.4                          | BTF3               | isoform 1 of Transcription factor BTF3                                                                     | 2(2)                              | 1.45                           | 0.15                  |
| IPI00741005.4                          | MGA                | MAX gene associated                                                                                        | 4(4)                              | 2.11                           | 0.57                  |
| <b>Intracellular protein transport</b> |                    |                                                                                                            |                                   |                                |                       |
| IPI00001639.2                          | KPNB1              | importin subunit beta-1                                                                                    | 4(3)                              | 1.85                           | 0.31                  |
| IPI00007401.1                          | IPO8               | Importin-8                                                                                                 | 4(2)                              | 3.17                           | 0.22                  |
| IPI00295857.6                          | COPA               | coatamer subunit alpha                                                                                     | 12(6)                             | 1.43                           | 0.35                  |
| IPI00298961.3                          | XPO1               | exportin-1                                                                                                 | 3(2)                              | 1.76                           | 0.91                  |

**Table S3 Continued**

| <b>IPI No.</b>                         | <b>Gene Symbol</b> | <b>Protein Name</b>                                                                 | <b>Pep. ID (Pep*)<sup>a</sup></b> | <b>Ratio (L/H)<sup>b</sup></b> | <b>SD<sup>c</sup></b> |
|----------------------------------------|--------------------|-------------------------------------------------------------------------------------|-----------------------------------|--------------------------------|-----------------------|
| <b>Intracellular signaling cascade</b> |                    |                                                                                     |                                   |                                |                       |
| IPI00007277.2                          | LRRFIP2            | isoform 1 of leucine-rich repeat flightless-interacting protein 2                   | 5(4)                              | 2.30                           | 0.43                  |
| IPI00014264.5                          | CENTB2             | centaurin-beta-2                                                                    | 16(8)                             | 1.43                           | 0.08                  |
| IPI00016639.7                          | PRKCI              | protein kinase C, iota                                                              | 3(3)                              | 1.75                           | 0.18                  |
| IPI00019459.1                          | MAP3K7IP1          | mitogen-activated protein kinase kinase kinase 7-interacting protein 1              | 11(5)                             | 1.86                           | 0.36                  |
| IPI00784013.1                          | JAK1               | janus kinase 1                                                                      | 6(4)                              | 1.80                           | 0.30                  |
| IPI00166840.3                          | MAP3K7IP3          | isoform 1 of Mitogen-activated protein kinase kinase kinase 7-interacting protein 3 | 4(2)                              | 2.63                           | 0.11                  |
| IPI00218566.1                          | MAP3K7             | isoform 1A of Mitogen-activated protein kinase kinase kinase 7                      | 6(4)                              | 1.76                           | 0.36                  |
| IPI00168691.7                          | SHCBP1             | SHC SH2 domain-binding protein 1                                                    | 4(3)                              | 2.90                           | 1.45                  |
| IPI00237011.5                          | STK38L             | serine/threonine-protein kinase 38-like                                             | 13(5)                             | 2.13                           | 0.23                  |
| <b>Cell cycle</b>                      |                    |                                                                                     |                                   |                                |                       |
| IPI00001560.2                          | CDKN2A             | cyclin-dependent kinase inhibitor                                                   | 3(2)                              | 1.52                           | 0.38                  |
| IPI00007927.3                          | SMC2               | isoform 1 of Structural maintenance of chromosomes protein 2                        | 3(1)                              | 2.31                           |                       |
| IPI00022043.1                          | TSC1               | hamartin                                                                            | 2(2)                              | 1.53                           | 0.21                  |
| IPI00550655.4                          | SPIN1              | spindlin-1                                                                          | 4(2)                              | 1.71                           | 0.12                  |
| <b>Apoptosis</b>                       |                    |                                                                                     |                                   |                                |                       |
| IPI00001871.2                          | PAWR               | PRKC apoptosis WT1 regulator protein                                                | 4(2)                              | 3.25                           | 0.88                  |
| IPI00013735.1                          | FASTKD2            | isoform 1 of FAST kinase domain-containing protein 2                                | 2(2)                              | 1.57                           | 0.21                  |
| IPI00022542.1                          | ROCK1              | Rho-associated protein kinase 1                                                     | 14(6)                             | 2.08                           | 0.29                  |

**Table S3 Continued**

| <b>IPI No.</b>                      | <b>Gene Symbol</b> | <b>Protein Name</b>                                                  | <b>Pep. ID (Pep*)<sup>a</sup></b> | <b>Ratio (L/H)</b> | <b>SD<sup>c</sup></b> |
|-------------------------------------|--------------------|----------------------------------------------------------------------|-----------------------------------|--------------------|-----------------------|
| <b>DNA and RNA binding</b>          |                    |                                                                      |                                   |                    |                       |
| IPI00012442.1                       | G3BP1              | Ras GTPase-activating protein-binding protein 1                      | 2(2)                              | 1.86               | 0.13                  |
| IPI00012726.4                       | PABPC4             | isoform 1 of polyadenylate-binding protein 4                         | 4(1)                              | 1.53               |                       |
| IPI00304596.3                       | NONO               | Non-POU domain-containing octamer-binding protein                    | 5(3)                              | 1.46               | 0.19                  |
| IPI00017297.1                       | MATR3              | Matrin-3                                                             | 4(2)                              | 1.41               | 0.61                  |
| IPI00030131.3                       | TMPO               | isoform Beta of lamina-associated polypeptide 2, isoforms beta/gamma | 3(2)                              | 1.84               | 0.05                  |
| IPI00030320.4                       | DDX6               | probable ATP-dependent RNA helicase DDX6                             | 2(1)                              | 1.43               |                       |
| IPI00844578.1                       | DHX9               | ATP-dependent RNA helicase A                                         | 9(5)                              | 1.41               | 0.22                  |
| <b>RNA splicing</b>                 |                    |                                                                      |                                   |                    |                       |
| IPI00009328.4                       | EIF4A3             | eukaryotic initiation factor 4A-III                                  | 4(2)                              | 1.57               | 0.01                  |
| IPI00010740.1                       | SFPQ               | isoform Long of Splicing factor, proline- and glutamine-rich         | 3(2)                              | 1.43               | 0.08                  |
| IPI00014319.5                       | IVNS1ABP           | influenza virus NS1 A-binding protein                                | 10(4)                             | 3.08               | 0.37                  |
| IPI00026089.3                       | SF3B1              | splicing factor 3B subunit 1                                         | 7(3)                              | 1.48               | 0.34                  |
| IPI00031556.7                       | U2AF2              | splicing factor U2AF 65 kDa subunit                                  | 2(2)                              | 1.47               | 0.50                  |
| IPI00221106.5                       | SF3B2              | splicing factor 3B subunit 2                                         | 5(2)                              | 1.65               | 0.30                  |
| <b>Nucleoside metabolic process</b> |                    |                                                                      |                                   |                    |                       |
| IPI00003168.1                       | PRPSAP2            | phosphoribosyl pyrophosphate synthetase-associated protein 2         | 15(4)                             | 4.06               | 0.28                  |
| IPI00219617.5                       | PRPS2              | isoform 1 of Ribose-phosphate pyrophosphokinase 2                    | 3(1)                              | 4.05               |                       |
| IPI00291578.7                       | PRPSAP1            | phosphoribosyl pyrophosphate synthetase-associated protein 1         | 9(3)                              | 2.58               | 0.25                  |
| IPI00301263.2                       | CAD                | CAD protein                                                          | 13(5)                             | 1.48               | 0.31                  |
| IPI00029054.1                       | NT5C2              | cytosolic purine 5'-nucleotidase                                     | 2(2)                              | 1.63               | 0.08                  |

**Table S3 Continued**

| <b>IPI No.</b>                            | <b>Gene Symbol</b> | <b>Protein Name</b>                                                          | <b>Pep. ID (Pep*)<sup>a</sup></b> | <b>Ratio (L/H)<sup>b</sup></b> | <b>SD<sup>c</sup></b> |
|-------------------------------------------|--------------------|------------------------------------------------------------------------------|-----------------------------------|--------------------------------|-----------------------|
| <b>Ubiquitination and ubiquitin cycle</b> |                    |                                                                              |                                   |                                |                       |
| IPI00030915.1                             | USP8               | ubiquitin carboxyl-terminal hydrolase 8                                      | 5(3)                              | 1.62                           | 0.06                  |
| IPI00033130.3                             | SAE1               | SUMO-activating enzyme subunit 1                                             | 2(1)                              | 1.53                           |                       |
| IPI00100160.3                             | CAND1              | isoform 1 of Cullin-associated NEDD8-dissociated protein 1                   | 8(4)                              | 1.48                           | 0.29                  |
| IPI00293464.5                             | DDB1               | DNA damage-binding protein 1                                                 | 8(4)                              | 1.44                           | 0.19                  |
| IPI00291802.3                             | LMO7               | isoform 3 of LIM domain only protein 7                                       | 20(7)                             | 2.86                           | 0.71                  |
| IPI00217407.2                             | UBR2               | isoform 4 of E3 ubiquitin-protein ligase UBR2                                | 7(3)                              | 2.54                           | 0.41                  |
| IPI00018971.8                             | TRIM21             | 52 kDa Ro protein                                                            | 4(3)                              | 1.79                           | 0.30                  |
| IPI00181396.5                             | VPRBP              | isoform 3 of Protein VPRBP                                                   | 2(2)                              | 1.79                           | 0.29                  |
| <b>Cytoskeleton and cell motility</b>     |                    |                                                                              |                                   |                                |                       |
| IPI00013808.1                             | ACTN4              | alpha-actinin-4                                                              | 16(7)                             | 1.55                           | 0.11                  |
| IPI00014516.1                             | CALD1              | isoform 1 of Caldesmon                                                       | 8(4)                              | 1.43                           | 0.25                  |
| IPI00183002.6                             | PPP1R12A           | isoform 1 of Protein phosphatase 1 regulatory subunit 12A                    | 5(4)                              | 1.47                           | 0.33                  |
| IPI00005087.1                             | TMOD3              | tropomodulin-3                                                               | 9(5)                              | 2.53                           | 0.23                  |
| <b>Translation</b>                        |                    |                                                                              |                                   |                                |                       |
| IPI00022648.2                             | EIF5               | eukaryotic translation initiation factor 5                                   | 4(1)                              | 1.76                           |                       |
| IPI00029012.1                             | EIF3A              | eukaryotic translation initiation factor 3 subunit A                         | 4(4)                              | 1.56                           | 0.24                  |
| IPI00221300.2                             | EIF2B1             | translation initiation factor eIF-2B subunit alpha                           | 3(3)                              | 1.73                           | 0.36                  |
| <b>Others</b>                             |                    |                                                                              |                                   |                                |                       |
| IPI00060181.1                             | EFHD2              | EF-hand domain-containing protein D2                                         | 2(2)                              | 2.66                           | 0.03                  |
| IPI00220249.3                             | LTBP1              | latent-transforming growth factor beta-binding protein, isoform 1L precursor | 5(1)                              | 1.70                           |                       |
| IPI00305267.2                             | GOLGA3             | isoform 1 of Golgin subfamily A member 3                                     | 28(8)                             | 1.47                           | 0.40                  |

**Table S3. Categorization of the identified BLM-induced 14-3-3ε interactors and their associations with different biological processes or pathways. All of MS-identified**

BLM-induced HCC-specific 14-3-3 $\epsilon$  interactors were grouped into the specific biological processes (BPs) or pathways by using online database-Gene Ontology (<http://geneontology.org/>) and DAVID (<http://david.abcc.ncifcrf.gov>).

a: Pep. ID refers to peptide number matched to a specific protein, Pep\* refers to peptide number used to quantify the protein. Protein ratio (L/H) was calculated by averaging the ratios of all leucine-containing peptides sequenced for each protein (b), and standard deviation (SD) was given to evaluate the accuracy of protein ratio(c).
