# Supplementary material for: 14-3-3ε Mediates the Cell Fate Decision-Making Pathways in Response of Hepatocellular Carcinoma to Bleomycin-Induced DNA Damage
Source: PubMed Central journal article supplement (PMC3589417; doi:10.1371/journal.pone.0055268), 2013-03-05
Supplement: pone.0055268.s010.pdf [file pone.0055268.s010.pdf]

**Table S4. The list of TAK1 sequence and primers for constructing the expressing plasmids.**

**1. TAK1(MAP3K7, isoform 1A) protein sequence**  
(O43318 (M3K7\_HUMAN), UniProtKB/Swiss-Prot)

|                     |                    |                    |            |            |                    |
|---------------------|--------------------|--------------------|------------|------------|--------------------|
| <u>10</u>           | <u>20</u>          | <u>30</u>          | <u>40</u>  | <u>50</u>  | <u>60</u>          |
| MSTASAASSS          | SSSSAGEMIE         | APSQVLNFEE         | IDYKEIEVEE | VVGRGAFGVV | CKAKWRAKDV         |
| <u>70</u>           | <u>80</u>          | <u>90</u>          | <u>100</u> | <u>110</u> | <u>120</u>         |
| AIKQIESESE          | RKAFIVELRQ         | LSRVNHPNIV         | KLYGACLNVP | CLVMEYAEGG | SLYNVLHGAE         |
| <u>130</u>          | <u>140</u>         | <u>150</u>         | <u>160</u> | <u>170</u> | <u>180</u>         |
| PLPYYTAAHA          | MSWCLQCSQG         | VAYLHSMQPK         | ALIHRDLKPP | NLLLVAGGTV | LKICDFGTAC         |
| <u>190</u>          | <u>200</u>         | <u>210</u>         | <u>220</u> | <u>230</u> | <u>240</u>         |
| DIQ <u>THMT</u> NNK | <u>G</u> SAAWMAPEV | FEGSNYSEKC         | DVFSWGIIW  | EVITRRKPPD | EIGGPAFRIM         |
| <u>250</u>          | <u>260</u>         | <u>270</u>         | <u>280</u> | <u>290</u> | <u>300</u>         |
| WAVHNGTRPP          | LIKNLPKPIE         | SLM <u>TRCWSKD</u> | PSQRPSMEEI | VKIMTHLMRY | FPGADEPLQY         |
| <u>310</u>          | <u>320</u>         | <u>330</u>         | <u>340</u> | <u>350</u> | <u>360</u>         |
| PCQYSDEGQS          | NSATSTGSFM         | DIASNTSNK          | SDTNMEQVPA | TNDTIKRLES | KLLKNQAKQQ         |
| <u>370</u>          | <u>380</u>         | <u>390</u>         | <u>400</u> | <u>410</u> | <u>420</u>         |
| SESGRLSLGA          | SRGSSVESLP         | PTSEGKRMSA         | DMSEIEARIA | ATTGNGQPRR | <u>R</u> SIQDLTVTG |
| <u>430</u>          | <u>440</u>         | <u>450</u>         | <u>460</u> | <u>470</u> | <u>480</u>         |
| TEPGQVSS <u>RS</u>  | <u>SSP</u> SVRMITT | SGPTSEKPTR         | SHPWTPDDST | DTNGSDNSIP | MAYLTLDHQL         |
| <u>490</u>          | <u>500</u>         | <u>510</u>         | <u>520</u> | <u>530</u> | <u>540</u>         |
| QPLAPCPNSK          | ESMAVFEQHC         | KMAQEYMKVQ         | TEIALLLQRK | QELVAELDQD | EKDQQNTSRL         |
| <u>550</u>          | <u>560</u>         | <u>570</u>         |            |            |                    |
| VQEHHKLLDE          | NKSLSTYYQQ         | CKKQLEVIRS         | QQQKRQGS   |            |                    |

\*Residues marked in red were all mutated to **Ala** for the following experiments.

\*Residues underlined surrounding Ser268 and Ser432 are putative 14-3-3 binding motifs on TAK1, respectively.

## 2. Primers for plasmid constructs:

### (1) Primers for N-terminal FLAG-tagged 14-3-3 $\epsilon$ (NM\_006761):

5'-CACCATGGACTACAAGGACGACGATGACAAGGATGATCGAGAGGATCTGGTG  
T-3'/5'-GTCAGATTTGGTGGTTCTCAGTGAC-3'

The bases underlined represent start codon and FLAG epitope-coded sequence. PCR products were directly introduced into pcDNA<sup>TM</sup>3.1 Directional TOPO Expression vector (Invitrogen, K4900-40) according to the manufacturer's protocol.

### (2) Primers for HA-tagged TAB1 (MAP3K3IP1, NM\_006116):

5'-ATAATAGTCGACCATGGCGGCGCAGAGGAGGAGCT-3'/5'-TGTAGGTACCCTAC  
GGTGCTGTCACCACGCT-3'

PCR products were introduced into pCMV-HA vector (Clontech) between SalI and KpnI sites.

### (3) Primers for HA-tagged full length TAK1 (NM\_003188, 1-579AA), TAK1 kinase domain (TAK1-N, 1-300AA) and TAK1-C-terminal domain (TAK1-C, 301-579AA):

5'-ATTAGTCGACCATGTCTACAGCCTCTGCCGCCT-3'/5'-CTAGGGTACCTCATGAA  
GTGCCTTGTCGT-3'

5'-ATTAGTCGACCATGTCTACAGCCTCTGCCGCCT-3'/5'-GGCCGGTACCTCAATAC  
TGTAATGGCTCATCTG-3'

5'-ACGCGTCGACCCCTTGTCAGTATTCAGATGA-3'/5'-CTAGGGTACCTCATGAAGT  
GCCTTGTCGT-3'

PCR products of those genes were introduced into pCMV-HA vector (Clontech) between SalI and KpnI sites.

### (4) Primers for individual site-specific mutant of HA-tagged TAK1:

#### HA-TAK1-T184A:

5'-GCCTGTGACATTCAGGCACACATGACCAATAACAAGG-3'/5'-  
CCTTGTTATTGGTCATGTGTGCCTGAATGTCACAGGC-3'

**HA-TAK1-T187A:**

5'-CAGACACACATGGCCAATAACAAGGGGAGTGCTGC-3'/5'-  
GCAGCACTCCCCTTGTTATTGGCCATGTGTGTCTG-3'

**HA-TAK1-S192A:**

5'-CCAATAACAAGGGGGCTGCTGCTTGGATGGC-3'/5'-  
GCCATCCAAGCAGCAGCCCCCTTGTTATTGG-3'

**HA-TAK1-S268A:**

5'-GATGACTCGTTGTTGGGCTAAAGATCCTTCCCAGCGCC-3'/5'-  
GGCGCTGGGAAGGATCTTTAGCCCAACAACGAGTCATC-3'

**HA-TAK1-S412A:**

5'-GGACAGCCAAGACGTAGAGCCATCCAAGACTTGACTGTAAGTGG-3'/5'-  
CCAGTTACAGTCAAGTCTTGGATGGCTCTACGTCTTGGCTGTCC-3'

**HA-TAK1-S432A:**

5'-TGAGCAGTAGGTCATCCGCTCCCAGTGTCAGAATGATTACTACC-3'/5'-GGTAG  
TAATCATTCTGACACTGGGAGCGGATGACCTACTGCTCAC-3'

Using pHA-TAK1 as template, all mutants were generated according to site-directed mutagenesis method.

All insert constructs listed above were confirmed by DNA sequencing.
